# Supplementary material
Source: Springer Nature journal article supplement (https://www.springermedizin.de/resource/supplementary/13256_2009_1306_MOESM2_ESM.pdf/9647460)

.....|.....  
 AATTGCAG CTGA  
 -----\*-----  
 -----\*-----  
 AATTGNAG CTGA  
 AATTGNAG CTGA

A

x

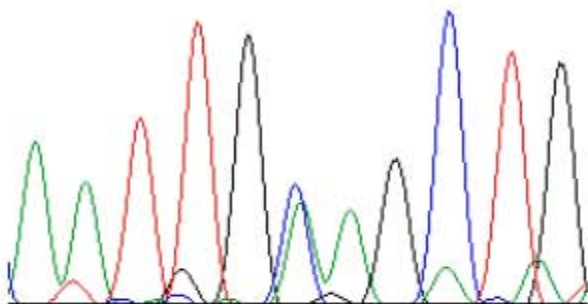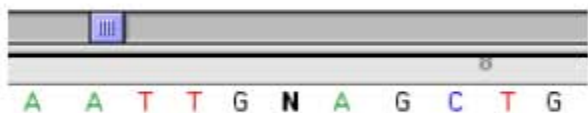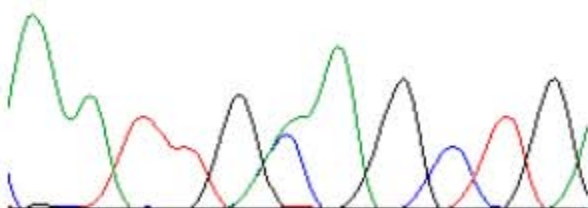

Supplement: MOESM2 [file 9647460]
